# Supplementary material for: Occurrence, Serotypes and Virulence Characteristics of Shiga-Toxin-Producing Escherichia coli Isolates from Goats on Communal Rangeland in South Africa
Source: MDPI journal article supplement (doi:10.3390/toxins14050353), 2022-05-18
Supplement: s1 [file s1]

# Supplementary Materials: Occurrence, Serotypes and Virulence Characteristics of Shiga-Toxin-Producing *Escherichia coli* Isolates from Goats on Communal Rangeland in South Africa

Mogaugedi N. Malahlela, Beniamino T. Cenci-Goga, Chris M. Marufu, Thierry Y. Fonkui, Luca Grispoldi, Eric Etter, Alan Kalake and Musafiri Karama

Table S1. Association between O group and H-type(s) among goat STEC Isolates.

| O- Group | Associated H- Type                                                                                                                    |
|----------|---------------------------------------------------------------------------------------------------------------------------------------|
| O3       | <b>H2</b> (1), H11 (1), H19 (1), <b>H21</b> (94)                                                                                      |
| O5       | <b>H19</b> (3)                                                                                                                        |
| O6       | H8 (1), H21 (1), <b>H49</b> (12)                                                                                                      |
| O7       | H7 (1)                                                                                                                                |
| O8       | <b>H2</b> (1), <b>H7</b> (1), <b>H8</b> (2), <b>H14</b> (3), <b>H19<sup>d</sup></b> (13), <b>H21<sup>d</sup></b> (5), <b>H49</b> (15) |
| O22      | <b>H8</b> (3)                                                                                                                         |
| O26      | <b>H2</b> (1)                                                                                                                         |
| O43      | <b>H2</b> (73), H8 (2)                                                                                                                |
| O49      | H11 (1)                                                                                                                               |
| O54      | H16 (1), H19 (1)                                                                                                                      |
| O64      | H18 (1)                                                                                                                               |
| O71      | <b>H1/12</b> (2), H14 (1)                                                                                                             |
| O75      | <b>H8</b> (37)                                                                                                                        |
| O76      | H2 (1), <b>H19</b> (50), H49 (1)                                                                                                      |
| O79      | H8 (1)                                                                                                                                |
| O103     | H8 (98), H56 (1)                                                                                                                      |
| O108     | H19 (1), H25 (12)                                                                                                                     |
| O111     | <b>H8</b> (2)                                                                                                                         |
| O113     | H8 (8)                                                                                                                                |
| O125     | <b>H19</b> (1)                                                                                                                        |
| O132     | H8 (1)                                                                                                                                |
| O146     | <b>H21</b> (31)                                                                                                                       |
| O157     | <b>H7</b> (30), <b>H8</b> (1), H29 (1)                                                                                                |
| O159     | H2 (1), H49 (1)                                                                                                                       |
| O163     | H2 (1), H8 (1)                                                                                                                        |
| O174     | <b>H8</b> (16)                                                                                                                        |
| O175     | H7 (1), H19 (1), <b>H21</b> (1)                                                                                                       |
| O176     | H4 (5)                                                                                                                                |
| O185     | H8 (4)                                                                                                                                |
| ON8      | H7 (4)                                                                                                                                |
| ON13     | H10 (1), H19 (9), HNT (1)                                                                                                             |
| OSB9     | H2 (1), H19 (11), H21(1)                                                                                                              |
| OX18     | H2 (26), H21 (1)                                                                                                                      |
| OX25     | H8 (17)                                                                                                                               |

The numbers in parentheses represent the number of goat isolates.

Serotypes in **bold** have been associated with human disease (Diarrhea, Blood diarrhea, hemorrhagic colitis, Hemolytic Uremic Syndrome) previously (reviewed by Bettelheim and Goldwater. 2019).

Table S2. Goat STEC major virulence factors and gene combinations.

| SEROTYPE  | No of isolates | <i>stx1</i> | <i>stx2</i> | <i>eaeA</i> | <i>hlyA</i> | Gene Combination        |
|-----------|----------------|-------------|-------------|-------------|-------------|-------------------------|
| O3:H2     | 1              | +           | -           | -           | +           | <i>stx1, hlyA</i>       |
| O3:H11    | 1              | +           | +           | -           | -           | <i>stx1, stx2</i>       |
| O3:H19    | 1              | +           | +           | -           | +           | <i>stx1, stx2, hlyA</i> |
| O3:H21    | 38             | +           | -           | -           | +           | <i>stx1, hlyA</i>       |
| O3:H21    | 39             | +           | +           | -           | +           | <i>stx1, stx2, hlyA</i> |
| O3:H21    | 8              | +           | -           | -           | -           | <i>stx1</i>             |
| O3:H21    | 8              | +           | +           | -           | -           | <i>stx1, stx2</i>       |
| O3:H21    | 1              | -           | +           | -           | -           | <i>stx2</i>             |
| O5:H19    | 3              | +           | +           | -           | +           | <i>stx1, stx2, hlyA</i> |
| O6:H8     | 1              | +           | +           | -           | +           | <i>stx1, stx2, hlyA</i> |
| O6:H21    | 1              | -           | +           | -           | -           | <i>stx2, hlyA</i>       |
| O6:H49    | 12             | -           | +           | -           | -           | <i>stx2</i>             |
| O7:H7     | 1              | +           | +           | -           | +           | <i>stx1, stx2, hlyA</i> |
| O8:H2     | 1              | +           | +           | -           | +           | <i>stx1, stx2, hlyA</i> |
| O8:H7     | 1              | -           | +           | -           | -           | <i>stx2</i>             |
| O8:H8     | 2              | +           | +           | -           | +           | <i>stx1, stx2, hlyA</i> |
| O8:H14    | 1              | +           | +           | -           | +           | <i>stx1, stx2, hlyA</i> |
| O8:H14    | 2              | -           | +           | -           | -           | <i>stx2</i>             |
| O8:H19    | 5              | +           | +           | -           | -           | <i>stx1, stx2</i>       |
| O8:H19    | 3              | +           | +           | -           | +           | <i>stx1, stx2, hlyA</i> |
| O8:H19    | 5              | -           | +           | -           | -           | <i>stx2</i>             |
| O8:H21    | 5              | -           | +           | -           | -           | <i>stx2</i>             |
| O8:H49    | 10             | -           | +           | -           | +           | <i>stx2, hlyA</i>       |
| O8:H49    | 5              | -           | +           | -           | -           | <i>stx2</i>             |
| O22:H8    | 3              | -           | +           | -           | -           | <i>stx2</i>             |
| O26:H2    | 1              | +           | -           | +           | +           | <i>stx1, eaeA, hlyA</i> |
| O43:H2    | 15             | +           | +           | -           | -           | <i>stx1, stx2</i>       |
| O43:H2    | 8              | +           | +           | -           | +           | <i>stx1, stx2, hlyA</i> |
| O43:H2    | 18             | -           | +           | -           | -           | <i>stx2</i>             |
| O43:H2    | 29             | +           | -           | -           | +           | <i>stx1, hlyA</i>       |
| O43:H2    | 3              | -           | +           | -           | +           | <i>stx2, hlyA</i>       |
| O43:H8    | 1              | +           | +           | -           | +           | <i>stx1, stx2, hlyA</i> |
| O43:H8    | 1              | +           | -           | -           | +           | <i>stx1, hlyA</i>       |
| O49:H11   | 1              | +           | -           | -           | +           | <i>stx1, hlyA</i>       |
| O54:H16   | 1              | +           | +           | -           | -           | <i>stx1, stx2</i>       |
| O54:H19   | 1              | +           | +           | -           | -           | <i>stx1, stx2</i>       |
| O64:H18   | 1              | +           | -           | -           | +           | <i>stx1, hlyA</i>       |
| O71:H1/12 | 2              | -           | +           | -           | +           | <i>stx2, hlyA</i>       |
| O71:H14   | 1              | -           | +           | +           | +           | <i>stx2, eaeA, hlyA</i> |
| O75:H8    | 33             | +           | +           | -           | +           | <i>stx1, stx2, hlyA</i> |
| O75:H8    | 1              | +           | -           | -           | -           | <i>stx1</i>             |
| O75:H8    | 3              | +           | +           | -           | -           | <i>stx1, stx2</i>       |
| O76:H2    | 1              | +           | -           | -           | +           | <i>stx1, hlyA</i>       |
| O76:H19   | 36             | +           | -           | -           | +           | <i>stx1, hlyA</i>       |

|           |    |   |   |   |   |                         |
|-----------|----|---|---|---|---|-------------------------|
| O76:H19   | 8  | + | - | - | - | <i>stx1</i>             |
| O76:H19   | 3  | - | + | - | - | <i>stx2</i>             |
| O76:H19   | 1  | - | + | - | + | <i>stx2, hlyA</i>       |
| O76:H19   | 2  | + | + | - | + | <i>stx1, stx2, hlyA</i> |
| O76:H49   | 1  | + | + | - | + | <i>stx1, stx2, hlyA</i> |
| O79:H8    | 1  | + | + | - | + | <i>stx1, stx2, hlyA</i> |
| O103:H8   | 96 | - | + | + | + | <i>stx2, eaeA, hlyA</i> |
| O103:H8   | 1  | + | - | + | + | <i>stx1, eaeA, hlyA</i> |
| O103:H8   | 1  | + | - | - | + | <i>stx1, hlyA</i>       |
| O103:H56  | 1  | + | - | - | + | <i>stx1, hlyA</i>       |
| O108:H19  | 1  | + | - | - | - | <i>stx1</i>             |
| O108:H25  | 4  | + | - | - | - | <i>stx1</i>             |
| O108:H25  | 4  | + | - | + | + | <i>stx1, eaeA, hlyA</i> |
| O108:H25  | 2  | + | - | + | - | <i>stx1, eaeA,</i>      |
| O108:H25  | 2  | + | - | - | + | <i>stx1, hlyA</i>       |
| O111:H8   | 2  | + | - | + | + | <i>stx1, eaeA, hlyA</i> |
| O113:H8   | 7  | - | + | - | + | <i>stx2, hlyA</i>       |
| O113:H8   | 1  | + | + | - | + | <i>stx1, stx2, hlyA</i> |
| O125:H19  | 1  | + | + | - | - | <i>stx1, stx2</i>       |
| O132:H8   | 1  | + | - | - | - | <i>stx1</i>             |
| O146:H21  | 16 | - | + | - | + | <i>stx2, hlyA</i>       |
| O146:H21  | 10 | + | + | - | + | <i>stx1, stx2, hlyA</i> |
| O146:H21  | 5  | + | - | - | - | <i>stx1</i>             |
| O157:H7   | 30 | - | + | + | + | <i>stx2, eaeA, hlyA</i> |
| O157:H8   | 1  | - | + | + | + | <i>stx2, eaeA, hlyA</i> |
| O157:H29  | 1  | - | + | - | - | <i>stx2</i>             |
| O159:H2   | 1  | + | + | - | + | <i>stx1, stx2, hlyA</i> |
| O159:H49  | 1  | + | + | - | + | <i>stx1, stx2, hlyA</i> |
| O163:H2   | 1  | + | - | - | - | <i>stx1</i>             |
| O163:H8   | 1  | + | - | + | + | <i>stx1, eaeA, hlyA</i> |
| O174:H8   | 13 | + | + | - | + | <i>stx1, stx2, hlyA</i> |
| O174:H8   | 3  | + | - | - | + | <i>stx1, hlyA</i>       |
| O175:H7   | 1  | + | + | - | + | <i>stx1, stx2, hlyA</i> |
| O175:H19  | 1  | + | - | - | + | <i>stx1, hlyA</i>       |
| O175:H21  | 1  | + | + | - | + | <i>stx1, stx2, hlyA</i> |
| O176:H4   | 5  | + | + | - | + | <i>stx1, stx2, hlyA</i> |
| O185:H8   | 2  | + | + | - | - | <i>stx1, stx2</i>       |
| O185:H8   | 2  | + | + | - | + | <i>stx1, stx2, hlyA</i> |
| OgN8:H7   | 4  | - | + | - | - | <i>stx2</i>             |
| OgN13:H10 | 1  | + | - | - | - | <i>stx1</i>             |
| OgN13:H19 | 8  | - | + | - | + | <i>stx2, hlyA</i>       |
| OgN13:H19 | 1  | - | + | - | - | <i>stx2</i>             |
| OgN13:H-  | 1  | + | - | - | - | <i>stx1</i>             |
| OgSB9:H2  | 1  | + | + | - | + | <i>stx1, stx2, hlyA</i> |
| OgSB9:H19 | 10 | + | + | - | + | <i>stx1, stx2, hlyA</i> |
| OgSB9:H19 | 1  | + | - | - | - | <i>stx1</i>             |

---

|            |     |      |      |      |      |                         |
|------------|-----|------|------|------|------|-------------------------|
| OgSB9:H21  | 1   | +    | +    | -    | +    | <i>stx1, stx2, hlyA</i> |
| OgX18:H2   | 2   | +    | +    | -    | -    | <i>stx1, stx2</i>       |
| OgX18:H2   | 24  | +    | +    | -    | +    | <i>stx1, stx2, hlyA</i> |
| OgX18:H21  | 1   | +    | -    | -    | -    | <i>stx1</i>             |
| OgX25:H8   | 10  | -    | +    | -    | +    | <i>stx2, hlyA</i>       |
| OgX25:H8   | 7   | +    | -    | -    | +    | <i>stx1, hlyA</i>       |
| ONT:H18    | 1   | +    | -    | -    | +    | <i>stx1, hlyA</i>       |
| ONT:H19    | 1   | +    | -    | -    | +    | <i>stx1, hlyA</i>       |
| ONT:H26    | 1   | +    | +    | -    | -    | <i>stx1, stx2,</i>      |
| ONT:H-     | 2   | +    | -    | -    | +    | <i>stx1, hlyA</i>       |
| ONT:H-     | 1   | +    | +    | -    | -    | <i>stx1, stx2</i>       |
| TOTAL      | 628 | 381  | 457  | 139  | 490  |                         |
| % Positive |     | 60.6 | 72.7 | 22.1 | 78.0 |                         |

---

Filename: toxins-1695506-supplementary.docx  
Directory: E:\5.17\computation-1719131  
Template: C:\Users\MDPI\Desktop\template\_supfile.dotx  
Title: Title  
Subject: A single paragraph of about 200 words maximum. For research articles, abstracts should give a pertinent overview of the work. We strongly encourage authors to use the following style of structured abstracts, but without headings: 1) Background: Place the  
Author: MDPI  
Keywords: keyword 1; keyword 2; keyword 3. List three to ten pertinent keywords specific to the article, yet reasonably common within the subject discipline.  
Comments:  
Creation Date: 6/27/2016 8:05:00 PM  
Change Number: 24  
Last Saved On: 5/17/2022 11:19:00 AM  
Last Saved By: MDPI  
Total Editing Time: 27 Minutes  
Last Printed On: 5/18/2022 10:02:00 AM  
As of Last Complete Printing  
Number of Pages: 4  
Number of Words: 804 (approx.)  
Number of Characters: 3,895 (approx.)
